# Supplementary material for: Inferring the transcriptional network of Bacillus subtilis
Source: Royal Society of Chemistry journal article supplement (doi:10.1039/b907310h), 2009-07-28
Supplement: b907310h.pdf [file b907310h.pdf]

## Supporting material

### Inferring the transcriptional network of *Bacillus subtilis*

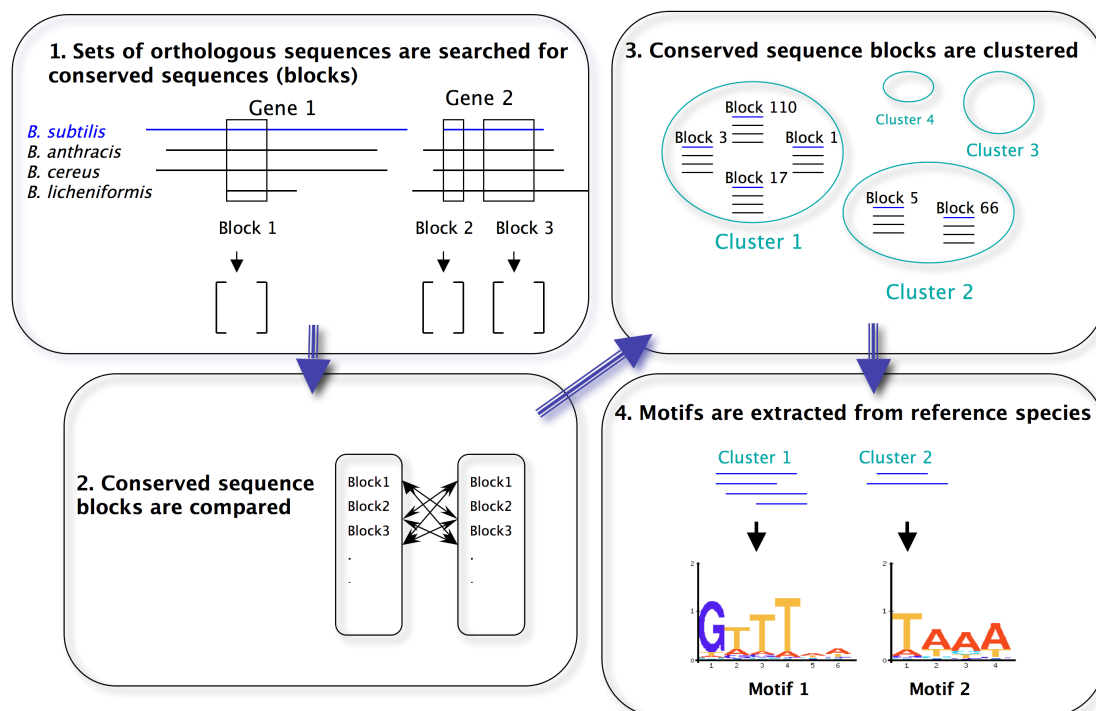

**Figure S1.** Workflow of the *de novo* motif detection. 1) Search for motifs in the orthologous space: conserved sequences (blocks) are extracted from the orthologous intergenic regions of four *Bacillus* species by means of BlockSampler, a Gibbs-sampling algorithm. The sequence of *B. subtilis* is indicated in blue. Detected conserved blocks are represented as PWMs; 2) Search for motifs in the co-expression space: All PWMs are aligned pair-wise and similarity scores are obtained 3) Similarity scores are used as input for clustering in order to identify groups of sequences sharing a common motif (or block as represented by a PWM); 4) Each block in a cluster corresponds to a different motif site of one particular regulator, conserved across the four different species. From each block within a cluster the sequence of *B. subtilis* is used to construct a *B. subtilis* specific motif model.

#### Evaluation of the *de novo* motif detection method

Predicted motif sites were compared with known motif sites reported in DBTBS. There are 605 known motif sites for the genes used in the study (i.e. genes that had orthologs across all four species). When a predicted motif site overlapped with a known site in DBTBS by at least 5 bp, the predicted site was considered a true positive (TP). We defined the following measures

$$\text{Recall} = \text{TP} / (\text{TP} + \text{FN})$$

$$\text{Precision} = \text{TP} / (\text{TP} + \text{FP})$$

$$\text{Density of hits} = \text{TP} / \text{length of concatenated potential motif sites}$$

where FN = false negatives, and FP = false positives. False negatives correspond to sites in DBTBS that were not recovered by our motif detection. Note that in this

calculation all predicted sites that are not overlapping with a known site are considered false positives. The latter assumption underestimates the precision of the method.

The phylogenetic footprinting step (BlockSampler output) resulted in the discovery of 7543 conserved sites in *B. subtilis*. The recall and precision after this step were 89% and 15.7% respectively; the density of hits was 0.68 hits/kb. Clustering similar blocks followed by motif extraction reduced the number of sites to 393, with a recall of 8.4% and a precision of 13.7% and a density of hits of 12.9 hits/kb.

As can be expected, reducing the number of motifs by exploiting the conservation between motifs results in a serious drop of sensitivity. The specificity remains approximately constant but the density of hits increases 19 times. This means that the initial blocks (phylogenetically conserved regions in single genes) contain sequences that are much larger than a motif. By using the co-regulation space these individually conserved regions could successfully be reduced to the cores of the conserved motifs that were shared by multiple genes. Note also that in the calculation of the precision, all novel predictions are considered FP. As a result, the slight drop in precision after reducing the number of motifs means that we lost relatively more known motif models than novel ones, i.e. relatively more novel motifs fulfill the more stringent parameters than known motifs.

### Selecting parameter values for DISTILLER

To determine optimal parameter settings for DISTILLER, we performed several test runs in which the main parameters were varied (see table S1). Predicted interactions resulting from each run were compared with known interactions documented in DBTBS. For each run, recall and precision were estimated as follows:

- Recall =  $TP / (TP+FN)$
- Precision =  $TP / (TP+FP)$

where TP = true positives, FN = false negatives, and FP = false positives. All used parameter settings tested are listed in Table S1, and the results are plotted in Figure S2. Test 14 resulted in the best trade off between precision and recall (measured by precision x recall). Therefore the parameter settings corresponding to test 14 were applied in our analysis: minimum number of genes in a module = 4; minimum number of conditions in a module = 30; number of randomizations = 100,000; box p-value threshold = 0.001; bandwidth = 0.00001.

In general, the effect of varying parameter settings on the ability of DISTILLER to recall known interactions versus predicting new ones was as follows:

1. Increasing the minimum number of genes in a module from 3 to 4 did not have a definitive effect.
2. Increasing the minimum number of arrays in a module from 30 to 50 did not have a definitive effect.
3. Increasing the motif threshold from 0.995 (p-value of 0.005) to 0.999 (p-value of 0.001) had a better recall x precision. This is not surprising, since the known motif sites have a score of 1, and increasing the threshold results in excluding many predicted instances.
4. Increasing the bandwidth threshold from a p-value of 0.0001 to 0.00001 yielded worse recall x precision. Bandwidth is a measure of the “tightness” of the genes’ co-expression in the sets of arrays tested, and here it seems that

relaxing the threshold could recall more of the known interactions.

**Table S1** Different parameter settings that were used to test the parameter sensitivity. Tests printed in gray could not be completed because of computational complexity.

| <b>Test</b> | <b>Motif threshold</b> | <b>No of genes</b> | <b>No of conditions</b> | <b>Bandwidth p-value</b> | <b>Randomizations</b> |
|-------------|------------------------|--------------------|-------------------------|--------------------------|-----------------------|
| test 1      | 0.995                  | 3                  | 30                      | 0.0001                   | 100,000               |
| test 2      | 0.995                  | 3                  | 30                      | 0.00001                  | 100,000               |
| test 3      | 0.995                  | 3                  | 50                      | 0.0001                   | 100,000               |
| test 4      | 0.995                  | 3                  | 50                      | 0.00001                  | 100,000               |
| test 5      | 0.995                  | 4                  | 30                      | 0.0001                   | 100,000               |
| test 6      | 0.995                  | 4                  | 30                      | 0.00001                  | 100,000               |
| test 7      | 0.995                  | 4                  | 50                      | 0.0001                   | 100,000               |
| test 8      | 0.995                  | 4                  | 50                      | 0.00001                  | 100,000               |
| test 9      | 0.999                  | 3                  | 30                      | 0.0001                   | 100,000               |
| test 10     | 0.999                  | 3                  | 30                      | 0.00001                  | 100,000               |
| test 11     | 0.999                  | 3                  | 50                      | 0.0001                   | 100,000               |
| test 12     | 0.999                  | 3                  | 50                      | 0.00001                  | 100,000               |
| test 13     | 0.999                  | 4                  | 30                      | 0.0001                   | 100,000               |
| test 14     | 0.999                  | 4                  | 30                      | 0.00001                  | 100,000               |
| test 15     | 0.999                  | 4                  | 50                      | 0.0001                   | 100,000               |
| test 16     | 0.999                  | 4                  | 50                      | 0.00001                  | 100,000               |

**Figure S2** Assessing different parameter settings on the precision and recall of DISTILLER. For the different parameter sets in table S1 precision (B), recall (A), and the product of precision and recall (C) were plotted for up to 150 best scoring modules. Parameter setting for test 14 was used in our analysis; it showed the best recall and near optimum precision.

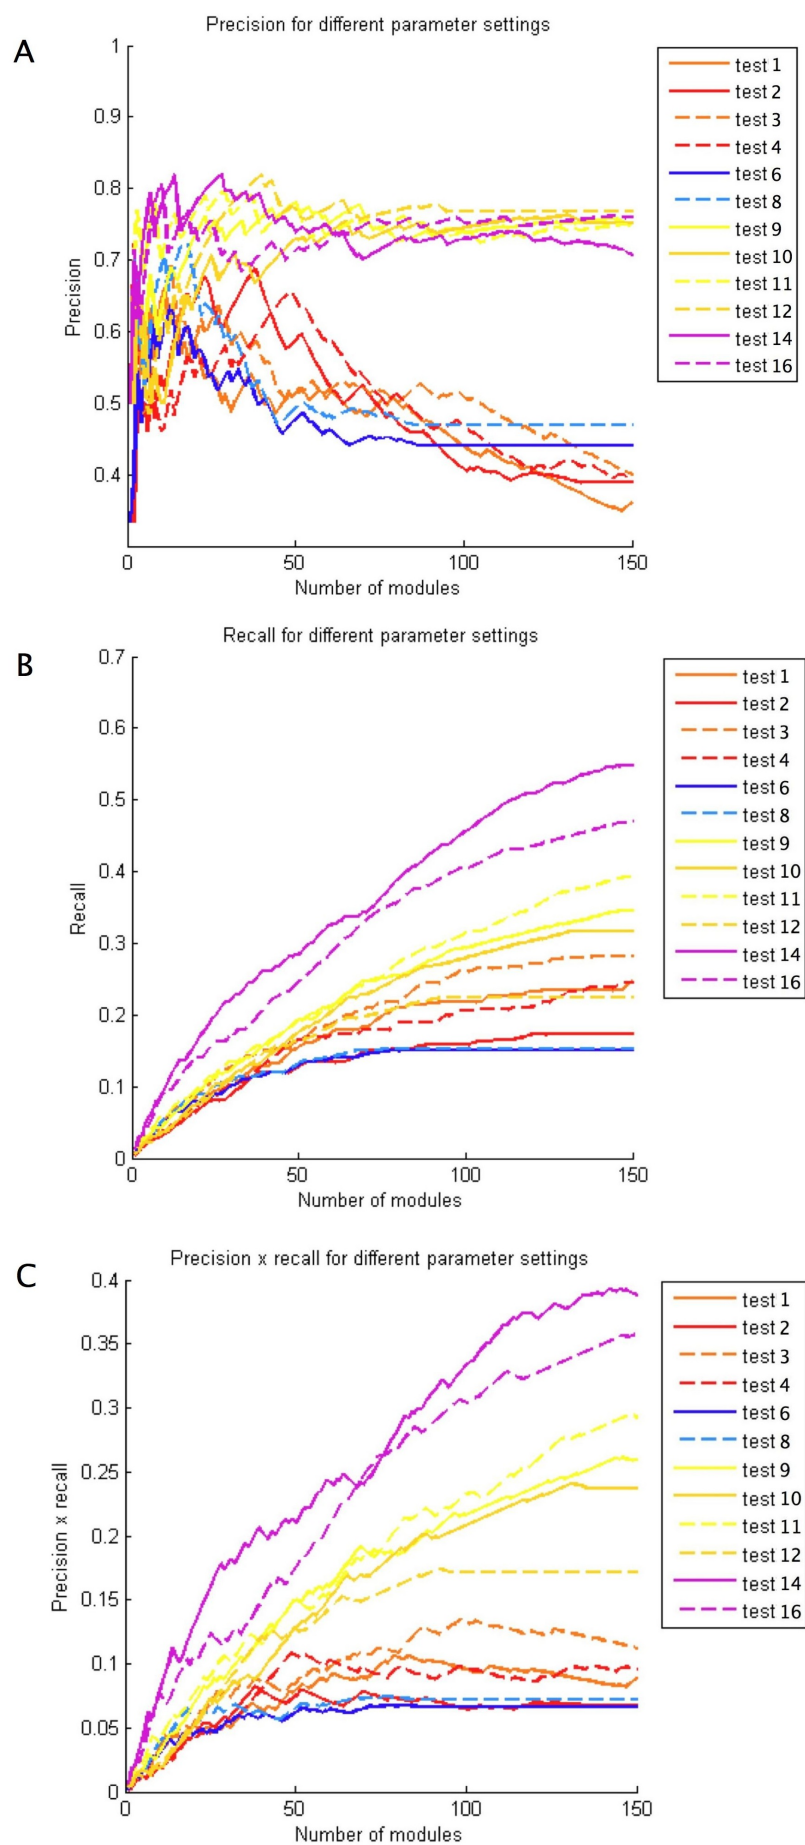

**Table S2.** Choosing an optimum genomic distance to assign regulators to groups of genes.

| Distance       | Recall             | Precision         | Recall x Precision |
|----------------|--------------------|-------------------|--------------------|
| <u>0</u>       | 0.4                | 0.338028169       | 0.135211268        |
| <u>1047</u>    | 0.491666667        | 0.286407767       | 0.140817152        |
| 2000           | 0.625              | 0.262237762       | 0.163898601        |
| 2100           | 0.641666667        | 0.264604811       | 0.169788087        |
| 2300           | 0.666666667        | 0.261437908       | 0.174291939        |
| 2400           | 0.675              | 0.255520505       | 0.172476341        |
| <b>2500</b>    | <b>0.691666667</b> | <b>0.25382263</b> | <b>0.175560653</b> |
| 2600           | 0.691666667        | 0.250755287       | 0.173439074        |
| 2700           | 0.691666667        | 0.246290801       | 0.170351137        |
| 2800           | 0.691666667        | 0.238505747       | 0.164966475        |
| 2900           | 0.691666667        | 0.233802817       | 0.161713615        |
| 3000           | 0.691666667        | 0.229916898       | 0.159025855        |
| 3500           | 0.708333333        | 0.222513089       | 0.157613438        |
| 4000           | 0.716666667        | 0.209756098       | 0.150325204        |
| 4500           | 0.725              | 0.201388889       | 0.146006944        |
| 6000           | 0.75               | 0.18              | 0.135              |
| <u>1763378</u> | 0.991666667        | 0.00895208        | 0.008877479        |

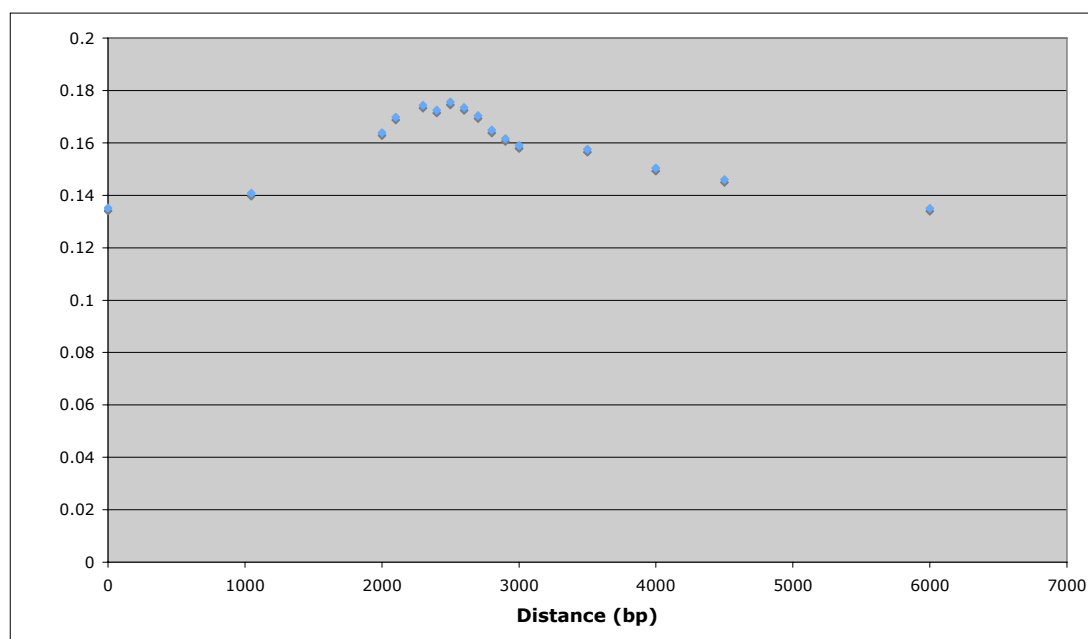

**Figure S3.** Choosing an optimum genomic distance to assign regulators to groups of genes.

**Caption for Table S2 and Figure S3.**

The distance between a regulator and its closest target gene was calculated for all documented regulators in DBTBS. The distance measure was taken from the middle of the coding sequences of the genes, taking circularity of the genome into account. The maximum, median, and minimum of those distances were 1763378, 1047, and 0 (auto-regulators), respectively (underlined in table S1). The recall and precision of the method of assigning a regulator to a group of target genes based on the genomic distance was calculated according to the formulas:

$$\text{Recall} = \text{TP}/(\text{TP}+\text{FN})$$

$$\text{Precision} = \text{TP}/(\text{TP}+\text{FP})$$

where TP = true positives, FN = false negatives, and FP = false positives.

True positives were calculated as follows: for all the known regulons of regulators documented in DBTBS, the number of the assigned regulators based on a certain genomic distance that match the true ones are true positives. False negatives are all those true regulators that were missed by our method, and the false positives are all the regulators wrongfully assigned to the regulons. To assess which of the distances measured best fit our method, the value of (recall x precision) was plotted for each distance, and the distance of 2500 bp had the highest value (highlighted in table S1).

**Table S3.** List of predicted novel interactions and their mode of regulation. Each predicted regulator-gene interaction is listed in the corresponding columns. A positive or negative mode of regulation is listed in the column 'Regulation', as well as the module in which this interaction was predicted.

| Regulator | Gene        | Regulation | Module |
|-----------|-------------|------------|--------|
| AbrB      | <i>appB</i> | Negative   | 12     |
| AbrB      | <i>appC</i> | Negative   | 12     |
| AbrB      | <i>appD</i> | Negative   | 12     |
| AbrB      | <i>pspA</i> | Negative   | 12     |
| AbrB      | <i>ydjG</i> | Negative   | 12     |
| AbrB      | <i>ydjI</i> | Negative   | 12     |
| AbrB      | <i>ywoF</i> | Negative   | 12     |
| AbrB      | <i>pksC</i> | Negative   | 37     |
| AbrB      | <i>pksD</i> | Negative   | 37     |
| AbrB      | <i>qcrA</i> | Negative   | 37     |
| AbrB      | <i>qcrB</i> | Negative   | 37     |
| AbrB      | <i>qcrC</i> | Negative   | 37     |
| AbrB      | <i>rapG</i> | Negative   | 37     |
| AbrB      | <i>rapH</i> | Negative   | 37     |
| AbrB      | <i>rapK</i> | Negative   | 37     |
| AbrB      | <i>sacT</i> | Negative   | 37     |
| AbrB      | <i>ybaJ</i> | Negative   | 37     |
| AbrB      | <i>ycbJ</i> | Negative   | 37     |
| AbrB      | <i>yheJ</i> | Negative   | 37     |
| AbrB      | <i>ykuU</i> | Negative   | 37     |
| AbrB      | <i>yqeB</i> | Negative   | 37     |
| AbrB      | <i>yqfA</i> | Negative   | 37     |
| AbrB      | <i>yurI</i> | Negative   | 37     |
| AbrB      | <i>yvzA</i> | Negative   | 37     |
| AbrB      | <i>ywfb</i> | Negative   | 37     |
| AbrB      | <i>ybdG</i> | Negative   | 60     |
| AbrB      | <i>yczC</i> | Negative   | 60     |
| AbrB      | <i>yocD</i> | Negative   | 61     |
| AbrB      | <i>yqjZ</i> | Negative   | 61     |
| AbrB      | <i>yxiF</i> | Negative   | 61     |
| AbrB      | <i>yxxF</i> | Negative   | 61     |
| AbrB      | <i>appA</i> | Negative   | 62     |
| AbrB      | <i>appF</i> | Negative   | 62     |
| AbrB      | <i>yjcH</i> | Negative   | 62     |
| AbrB      | <i>yjiB</i> | Negative   | 62     |
| AbrB      | <i>yocS</i> | Negative   | 62     |

---

|      |                |          |     |
|------|----------------|----------|-----|
| AbrB | <i>yueE</i>    | Negative | 62  |
| AbrB | <i>ywaA</i>    | Negative | 62  |
| AbrB | <i>acpA</i>    | Negative | 104 |
| AbrB | <i>cspB</i>    | Negative | 104 |
| AbrB | <i>tnrA</i>    | Negative | 104 |
| AbrB | <i>veg</i>     | Negative | 104 |
| AbrB | <i>yceC</i>    | Negative | 104 |
| AbrB | <i>yceD</i>    | Negative | 104 |
| AbrB | <i>yceK</i>    | Negative | 104 |
| AbrB | <i>ykoF</i>    | Negative | 104 |
| AbrB | <i>yktD</i>    | Negative | 104 |
| AbrB | <i>ykuR</i>    | Negative | 104 |
| AbrB | <i>yzkG</i>    | Negative | 104 |
| AbrB | <i>ylmC</i>    | Negative | 104 |
| AbrB | <i>ymfC</i>    | Negative | 104 |
| AbrB | <i>yobQ</i>    | Negative | 104 |
| AbrB | <i>yraM</i>    | Negative | 104 |
| AbrB | <i>yceE</i>    | Negative | 130 |
| AbrB | <i>yceF</i>    | Negative | 130 |
| AbrB | <i>yokG</i>    | Negative | 130 |
| AbrB | <i>yuiE</i>    | Negative | 130 |
| AbrB | <i>yrdC</i>    | Negative | 131 |
| AbrB | <i>hom</i>     | Negative | 132 |
| AbrB | <i>mdr</i>     | Negative | 132 |
| AbrB | <i>oppA</i>    | Negative | 132 |
| AbrB | <i>ybgG</i>    | Negative | 132 |
| AbrB | <i>ycgM</i>    | Negative | 132 |
| AbrB | <i>ydeI</i>    | Negative | 132 |
| AbrB | <i>yfhP</i>    | Negative | 132 |
| AbrB | <i>ygaF</i>    | Negative | 132 |
| AbrB | <i>yoaE</i>    | Negative | 132 |
| AbrB | <i>yqgB</i>    | Negative | 132 |
| AbrB | <i>yrpB</i>    | Negative | 132 |
| CcpA | <i>glpQ</i>    | Negative | 51  |
| CcpA | <i>glpT</i>    | Negative | 51  |
| CcpA | <i>infC</i>    | Negative | 51  |
| CcpA | <i>jag</i>     | Negative | 51  |
| CcpA | <i>kbl</i>     | Negative | 51  |
| CcpA | <i>rocB</i>    | Negative | 51  |
| CcpA | <i>rplT</i>    | Negative | 51  |
| CcpA | <i>rpmB</i>    | Negative | 51  |
| CcpA | <i>rpmI</i>    | Negative | 51  |
| CcpA | <i>spoIIIJ</i> | Negative | 51  |
| CcpA | <i>ybxF</i>    | Negative | 51  |
| CcpA | <i>ycbF</i>    | Negative | 51  |
| CcpA | <i>ycaA</i>    | Negative | 51  |
| CcpA | <i>yesL</i>    | Negative | 51  |
| CcpA | <i>yfiG</i>    | Negative | 51  |
| CcpA | <i>yulD</i>    | Negative | 51  |
| CcpA | <i>yvdF</i>    | Negative | 51  |
| CcpA | <i>yvdH</i>    | Negative | 51  |
| CcpA | <i>yvdJ</i>    | Negative | 51  |
| CcpA | <i>msmR</i>    | Negative | 52  |

---

|      |             |          |     |
|------|-------------|----------|-----|
| CcpA | <i>mtlA</i> | Negative | 52  |
| CcpA | <i>pmi</i>  | Negative | 52  |
| CcpA | <i>sacA</i> | Negative | 52  |
| CcpA | <i>sacP</i> | Negative | 52  |
| CcpA | <i>ysbA</i> | Negative | 52  |
| CcpA | <i>epr</i>  | Negative | 83  |
| CcpA | <i>lplA</i> | Negative | 83  |
| CcpA | <i>manP</i> | Negative | 83  |
| CcpA | <i>manR</i> | Negative | 83  |
| CcpA | <i>punA</i> | Negative | 83  |
| CcpA | <i>ydhM</i> | Negative | 83  |
| CcpA | <i>ydhT</i> | Negative | 83  |
| CcpA | <i>yncC</i> | Negative | 83  |
| CcpA | <i>yugN</i> | Negative | 83  |
| CcpA | <i>xsa</i>  | Negative | 84  |
| CcpA | <i>ydeR</i> | Negative | 84  |
| CcpA | <i>ywcE</i> | Negative | 84  |
| CcpA | <i>ywcJ</i> | Negative | 84  |
| CcpA | <i>ywhE</i> | Negative | 84  |
| CcpA | <i>dhaS</i> | Negative | 86  |
| CcpA | <i>gutR</i> | Negative | 86  |
| CcpA | <i>ykoM</i> | Negative | 86  |
| CcpA | <i>yslB</i> | Negative | 86  |
| CcpA | <i>yurN</i> | Negative | 86  |
| CcpA | <i>citH</i> | Negative | 114 |
| CcpA | <i>galK</i> | Negative | 114 |
| CcpA | <i>pta</i>  | Negative | 114 |
| CcpA | <i>yrzF</i> | Negative | 114 |
| CcpA | <i>yshB</i> | Negative | 114 |
| CcpA | <i>gcaD</i> | Negative | 115 |
| CcpA | <i>prs</i>  | Negative | 115 |
| CcpA | <i>ybcF</i> | Negative | 115 |
| CcpA | <i>ylbN</i> | Negative | 115 |
| CcpA | <i>ytkP</i> | Negative | 115 |
| CcpA | <i>ytxD</i> | Negative | 115 |
| CcpA | <i>cccA</i> | Negative | 116 |
| CcpA | <i>cstA</i> | Negative | 116 |
| CcpA | <i>rocA</i> | Negative | 116 |
| CcpA | <i>rocC</i> | Negative | 116 |
| CcpA | <i>rocD</i> | Negative | 116 |
| CcpA | <i>rocE</i> | Negative | 116 |
| CcpA | <i>rocF</i> | Negative | 116 |
| CcpA | <i>yckB</i> | Negative | 116 |
| CcpA | <i>ydzA</i> | Negative | 116 |
| CcpA | <i>yodJ</i> | Negative | 116 |
| CcpA | <i>yojA</i> | Negative | 116 |
| CcpA | <i>ypmQ</i> | Negative | 116 |
| CcpA | <i>ytcP</i> | Negative | 116 |
| CcpA | <i>dctB</i> | Negative | 136 |
| CcpA | <i>sigI</i> | Negative | 136 |
| CcpA | <i>yydK</i> | Negative | 136 |
| CodY | <i>appC</i> | Negative | 55  |
| CodY | <i>appD</i> | Negative | 55  |



---

|      |              |          |     |
|------|--------------|----------|-----|
| CodY | <i>bioI</i>  | Negative | 55  |
| CodY | <i>comGD</i> | Negative | 55  |
| CodY | <i>yjcG</i>  | Negative | 55  |
| CodY | <i>ykvW</i>  | Negative | 55  |
| CodY | <i>yqzE</i>  | Negative | 55  |
| CodY | <i>yrkF</i>  | Negative | 55  |
| CodY | <i>yuiA</i>  | Negative | 55  |
| CodY | <i>yuxL</i>  | Negative | 55  |
| CodY | <i>ywcE</i>  | Negative | 55  |
| CodY | <i>yxiA</i>  | Negative | 55  |
| CodY | <i>yxjG</i>  | Negative | 55  |
| ComK | <i>pksI</i>  | Positive | 22  |
| ComK | <i>ywfM</i>  | Positive | 22  |
| ComK | <i>yvdF</i>  | Positive | 22  |
| ComK | <i>lexA</i>  | Positive | 81  |
| ComK | <i>parC</i>  | Positive | 81  |
| ComK | <i>parE</i>  | Positive | 81  |
| ComK | <i>ruvA</i>  | Positive | 81  |
| ComK | <i>ruvB</i>  | Positive | 81  |
| ComK | <i>uvrA</i>  | Positive | 81  |
| ComK | <i>uvrB</i>  | Positive | 81  |
| ComK | <i>yhaM</i>  | Positive | 81  |
| ComK | <i>yhaO</i>  | Positive | 81  |
| ComK | <i>yqjY</i>  | Positive | 81  |
| ComK | <i>yckE</i>  | Positive | 138 |
| ComK | <i>yjbF</i>  | Positive | 138 |
| ComK | <i>yqzG</i>  | Positive | 138 |
| ComK | <i>bioA</i>  | Positive | 139 |
| ComK | <i>bioB</i>  | Positive | 139 |
| ComK | <i>bioD</i>  | Positive | 139 |
| ComK | <i>bioF</i>  | Positive | 139 |
| ComK | <i>bioI</i>  | Positive | 139 |
| ComK | <i>bioW</i>  | Positive | 139 |
| ComK | <i>clpP</i>  | Positive | 139 |
| ComK | <i>dnaK</i>  | Positive | 139 |
| ComK | <i>grpE</i>  | Positive | 139 |
| ComK | <i>hrcA</i>  | Positive | 139 |
| ComK | <i>metS</i>  | Positive | 139 |
| ComK | <i>pabA</i>  | Positive | 139 |
| ComK | <i>pabB</i>  | Positive | 139 |
| ComK | <i>pabC</i>  | Positive | 139 |
| ComK | <i>rph</i>   | Positive | 139 |
| ComK | <i>slr</i>   | Positive | 139 |
| ComK | <i>spoVB</i> | Positive | 139 |
| ComK | <i>yacF</i>  | Positive | 139 |
| ComK | <i>ycgM</i>  | Positive | 139 |
| ComK | <i>yisT</i>  | Positive | 139 |
| ComK | <i>yokB</i>  | Positive | 139 |
| ComK | <i>ytbQ</i>  | Positive | 139 |
| ComK | <i>ywfB</i>  | Positive | 139 |
| ComK | <i>ywrO</i>  | Positive | 139 |
| ComK | <i>yxiF</i>  | Positive | 139 |
| ComK | <i>pksC</i>  | Positive | 141 |

---

---

|      |             |          |     |
|------|-------------|----------|-----|
| ComK | <i>rapK</i> | Positive | 141 |
| ComK | <i>ybdN</i> | Positive | 141 |
| ComK | <i>ybfO</i> | Positive | 141 |
| ComK | <i>ycbJ</i> | Positive | 141 |
| ComK | <i>yfnK</i> | Positive | 141 |
| ComK | <i>yvaW</i> | Positive | 141 |
| ComK | <i>yvaX</i> | Positive | 141 |
| ComK | <i>yvaY</i> | Positive | 141 |
| ComK | <i>yvaZ</i> | Positive | 141 |
| ComK | <i>yvbA</i> | Positive | 141 |
| ComK | <i>yvzA</i> | Positive | 141 |
| ComK | <i>yweA</i> | Positive | 141 |
| ComK | <i>ywqC</i> | Positive | 141 |
| ComK | <i>yybJ</i> | Positive | 141 |
| ComK | <i>yybK</i> | Positive | 141 |
| ComK | <i>yybL</i> | Positive | 141 |
| ComK | <i>yybM</i> | Positive | 141 |
| ComK | <i>yybN</i> | Positive | 141 |
| ComK | <i>yvdG</i> | Positive | 141 |
| ComK | <i>yvdH</i> | Positive | 141 |
| ComK | <i>yvdI</i> | Positive | 141 |
| ComK | <i>yvdJ</i> | Positive | 141 |
| ComK | <i>ycgL</i> | Unknown  | 80  |
| ComK | <i>ydfL</i> | Unknown  | 80  |
| ComK | <i>ydhH</i> | Unknown  | 80  |
| ComK | <i>ywbO</i> | Unknown  | 80  |
| ComK | <i>ywoB</i> | Unknown  | 80  |
| ComK | <i>atpI</i> | Unknown  | 82  |
| ComK | <i>hemL</i> | Unknown  | 82  |
| ComK | <i>kinB</i> | Unknown  | 82  |
| ComK | <i>rpsL</i> | Unknown  | 82  |
| ComK | <i>rsbT</i> | Unknown  | 82  |
| ComK | <i>sipV</i> | Unknown  | 82  |
| ComK | <i>tnrA</i> | Unknown  | 82  |
| ComK | <i>yabD</i> | Unknown  | 82  |
| ComK | <i>yceK</i> | Unknown  | 82  |
| ComK | <i>ydiQ</i> | Unknown  | 82  |
| ComK | <i>ynfE</i> | Unknown  | 82  |
| ComK | <i>yobQ</i> | Unknown  | 82  |
| ComK | <i>yodF</i> | Unknown  | 82  |
| ComK | <i>yogA</i> | Unknown  | 82  |
| ComK | <i>yqeL</i> | Unknown  | 82  |
| ComK | <i>yrvI</i> | Unknown  | 82  |
| ComK | <i>yvzD</i> | Unknown  | 82  |
| ComK | <i>ywqB</i> | Unknown  | 82  |
| ComK | <i>yybB</i> | Unknown  | 82  |
| ComK | <i>degS</i> | Unknown  | 109 |
| ComK | <i>ilvB</i> | Unknown  | 109 |
| ComK | <i>ilvC</i> | Unknown  | 109 |
| ComK | <i>leuA</i> | Unknown  | 109 |
| ComK | <i>leuB</i> | Unknown  | 109 |
| ComK | <i>leuC</i> | Unknown  | 109 |
| ComK | <i>leuD</i> | Unknown  | 109 |

---

|      |             |          |     |
|------|-------------|----------|-----|
| ComK | <i>lonA</i> | Unknown  | 109 |
| ComK | <i>nprE</i> | Unknown  | 109 |
| ComK | <i>pycA</i> | Unknown  | 109 |
| ComK | <i>sigH</i> | Unknown  | 109 |
| ComK | <i>yfhB</i> | Unknown  | 109 |
| ComK | <i>yjcH</i> | Unknown  | 109 |
| ComK | <i>yjcl</i> | Unknown  | 109 |
| ComK | <i>yjcJ</i> | Unknown  | 109 |
| ComK | <i>yjcS</i> | Unknown  | 109 |
| ComK | <i>yjdA</i> | Unknown  | 109 |
| ComK | <i>yoaD</i> | Unknown  | 109 |
| ComK | <i>yoaE</i> | Unknown  | 109 |
| ComK | <i>yobK</i> | Unknown  | 109 |
| ComK | <i>yokD</i> | Unknown  | 109 |
| ComK | <i>ypdA</i> | Unknown  | 109 |
| ComK | <i>ypfD</i> | Unknown  | 109 |
| ComK | <i>yqgP</i> | Unknown  | 109 |
| ComK | <i>yqjI</i> | Unknown  | 109 |
| ComK | <i>yrpB</i> | Unknown  | 109 |
| ComK | <i>yurK</i> | Unknown  | 109 |
| ComK | <i>ywfH</i> | Unknown  | 109 |
| ComK | <i>ywnF</i> | Unknown  | 109 |
| ComK | <i>yxjG</i> | Unknown  | 109 |
| ComK | <i>hemB</i> | Unknown  | 140 |
| ComK | <i>ytaG</i> | Unknown  | 140 |
| Fur  | <i>fhuB</i> | Negative | 1   |
| Fur  | <i>yetG</i> | Negative | 1   |
| Fur  | <i>yxeC</i> | Negative | 8   |
| Fur  | <i>yclM</i> | Negative | 46  |
| Fur  | <i>ykuJ</i> | Negative | 46  |
| Fur  | <i>fhuC</i> | Negative | 105 |
| Fur  | <i>ykvW</i> | Negative | 122 |
| Fur  | <i>ypbB</i> | Negative | 123 |
| Fur  | <i>clpP</i> | Unknown  | 58  |
| Fur  | <i>dps</i>  | Unknown  | 58  |
| Fur  | <i>gspA</i> | Unknown  | 58  |
| Fur  | <i>ydaN</i> | Unknown  | 58  |
| Fur  | <i>yflA</i> | Unknown  | 58  |
| Fur  | <i>yzkA</i> | Unknown  | 58  |
| Fur  | <i>yocB</i> | Unknown  | 58  |
| Fur  | <i>yqgZ</i> | Unknown  | 58  |
| Fur  | <i>yumB</i> | Unknown  | 58  |
| Fur  | <i>yvaA</i> | Unknown  | 58  |
| Fur  | <i>ywiE</i> | Unknown  | 58  |
| Fur  | <i>yxzF</i> | Unknown  | 58  |
| GerE | <i>ylbD</i> | Unknown  | 2   |
| GerE | <i>yisZ</i> | Unknown  | 6   |
| GerE | <i>yitA</i> | Unknown  | 6   |
| GerE | <i>yitB</i> | Unknown  | 6   |
| LexA | <i>ymaC</i> | Negative | 9   |
| LexA | <i>yprA</i> | Negative | 9   |
| LexA | <i>yvsG</i> | Negative | 9   |
| LexA | <i>pcrB</i> | Negative | 128 |

|      |              |          |     |
|------|--------------|----------|-----|
| PerR | <i>dhbA</i>  | Unknown  | 8   |
| PerR | <i>dhbC</i>  | Unknown  | 8   |
| PerR | <i>feuA</i>  | Unknown  | 8   |
| PerR | <i>feuB</i>  | Unknown  | 8   |
| PerR | <i>feuC</i>  | Unknown  | 8   |
| PerR | <i>fhuB</i>  | Unknown  | 8   |
| PerR | <i>fhuD</i>  | Unknown  | 8   |
| PerR | <i>ybbA</i>  | Unknown  | 8   |
| PerR | <i>ydbN</i>  | Unknown  | 8   |
| PerR | <i>yfhA</i>  | Unknown  | 8   |
| PerR | <i>yfiY</i>  | Unknown  | 8   |
| PerR | <i>yfiZ</i>  | Unknown  | 8   |
| PerR | <i>yfmC</i>  | Unknown  | 8   |
| PerR | <i>yhfQ</i>  | Unknown  | 8   |
| PerR | <i>ykuN</i>  | Unknown  | 8   |
| PerR | <i>ykuO</i>  | Unknown  | 8   |
| PerR | <i>yoaJ</i>  | Unknown  | 8   |
| PerR | <i>yusV</i>  | Unknown  | 8   |
| PerR | <i>ywbL</i>  | Unknown  | 8   |
| PerR | <i>ywbM</i>  | Unknown  | 8   |
| PerR | <i>ywbN</i>  | Unknown  | 8   |
| PerR | <i>yxeB</i>  | Unknown  | 8   |
| PerR | <i>yxeC</i>  | Unknown  | 8   |
| PerR | <i>citZ</i>  | Unknown  | 29  |
| PerR | <i>tagB</i>  | Unknown  | 29  |
| PerR | <i>yurY</i>  | Unknown  | 29  |
| PerR | <i>dhbB</i>  | Unknown  | 137 |
| PerR | <i>dhbE</i>  | Unknown  | 137 |
| PerR | <i>dhbF</i>  | Unknown  | 137 |
| PerR | <i>ybbB</i>  | Unknown  | 137 |
| PerR | <i>yetG</i>  | Unknown  | 137 |
| PerR | <i>ykuP</i>  | Unknown  | 137 |
| PerR | <i>yuiI</i>  | Unknown  | 137 |
| ResD | <i>bglP</i>  | Positive | 45  |
| ResD | <i>hemA</i>  | Positive | 45  |
| ResD | <i>hemB</i>  | Positive | 45  |
| ResD | <i>narG</i>  | Positive | 45  |
| ResD | <i>narH</i>  | Positive | 45  |
| ResD | <i>narI</i>  | Positive | 45  |
| ResD | <i>narJ</i>  | Positive | 45  |
| ResD | <i>ydbL</i>  | Positive | 45  |
| ResD | <i>yhfO</i>  | Positive | 45  |
| ResD | <i>yqxI</i>  | Positive | 45  |
| ResD | <i>yueJ</i>  | Positive | 45  |
| ResD | <i>yxiE</i>  | Positive | 45  |
| SigB | <i>rsbR</i>  | Positive | 7   |
| SigE | <i>yisZ</i>  | Positive | 33  |
| SigE | <i>yitA</i>  | Positive | 33  |
| SigE | <i>yitB</i>  | Positive | 33  |
| SigE | <i>comER</i> | Positive | 72  |
| SigE | <i>sspB</i>  | Positive | 72  |
| SigE | <i>ybaK</i>  | Positive | 72  |
| SigE | <i>yhcN</i>  | Positive | 72  |

|         |               |          |     |
|---------|---------------|----------|-----|
| SigE    | <i>yogA</i>   | Positive | 72  |
| SigE    | <i>yvlA</i>   | Positive | 72  |
| SigE    | <i>yblI</i>   | Positive | 74  |
| SigE    | <i>sigG</i>   | Positive | 75  |
| SigE    | <i>xsa</i>    | Positive | 75  |
| SigE    | <i>cgeC</i>   | Positive | 101 |
| SigE    | <i>yfiA</i>   | Positive | 101 |
| SigE    | <i>yfnF</i>   | Positive | 101 |
| SigE    | <i>yfnG</i>   | Positive | 101 |
| SigE    | <i>yfnH</i>   | Positive | 101 |
| SigE    | <i>yqfQ</i>   | Positive | 101 |
| SigE    | <i>gapB</i>   | Positive | 125 |
| SigE    | <i>ykuD</i>   | Positive | 125 |
| SigE    | <i>oppB</i>   | Positive | 127 |
| SigF    | <i>csbX</i>   | Positive | 50  |
| SigF    | <i>yfhE</i>   | Positive | 50  |
| SigF    | <i>yfhF</i>   | Positive | 50  |
| SigH    | <i>ywfG</i>   | Positive | 43  |
| SigH    | <i>rapE</i>   | Positive | 87  |
| SigH    | <i>rapG</i>   | Positive | 87  |
| SigH    | <i>rapH</i>   | Positive | 87  |
| SigH    | <i>yqjZ</i>   | Positive | 87  |
| SigH    | <i>citG</i>   | Positive | 120 |
| SigW    | <i>appB</i>   | Positive | 12  |
| SigW    | <i>appC</i>   | Positive | 12  |
| SigW    | <i>appD</i>   | Positive | 12  |
| SigW    | <i>ywoF</i>   | Positive | 12  |
| SigW    | <i>dnaK</i>   | Positive | 28  |
| SigW    | <i>grpE</i>   | Positive | 28  |
| SigW    | <i>hrcA</i>   | Positive | 28  |
| SigW    | <i>ydgC</i>   | Positive | 28  |
| SigW    | <i>yjbI</i>   | Positive | 28  |
| SigW    | <i>ypuD</i>   | Positive | 28  |
| SigW    | <i>yrzG</i>   | Positive | 28  |
| SigW    | <i>yugM</i>   | Positive | 28  |
| SigW    | <i>yutM</i>   | Positive | 28  |
| SigW    | <i>ywdE</i>   | Positive | 28  |
| SigW    | <i>ywsA</i>   | Positive | 28  |
| SigW    | <i>yczC</i>   | Positive | 56  |
| SigW    | <i>ykuA</i>   | Positive | 56  |
| SigW    | <i>yugI</i>   | Positive | 57  |
| SigW    | <i>yuzE</i>   | Positive | 98  |
| SigW    | <i>yqgU</i>   | Positive | 99  |
| SigW    | <i>lytR</i>   | Positive | 129 |
| SigW    | <i>sunT</i>   | Positive | 129 |
| SigW    | <i>yncM</i>   | Positive | 129 |
| SigW    | <i>yxbC</i>   | Positive | 129 |
| SigW    | <i>yxbD</i>   | Positive | 129 |
| Spo0A   | <i>ywkC</i>   | Positive | 31  |
| Spo0A   | <i>yhjM</i>   | Unknown  | 32  |
| Spo0A   | <i>yodL</i>   | Unknown  | 32  |
| SpoIIID | <i>dacB</i>   | Negative | 10  |
| SpoIIID | <i>spoIIP</i> | Negative | 11  |

|         |             |          |    |
|---------|-------------|----------|----|
| SpoIIID | <i>yloB</i> | Negative | 17 |
| SpoIIID | <i>yoaN</i> | Positive | 69 |
| SpoIIID | <i>cotV</i> | Unknown  | 13 |
| SpoIIID | <i>cotW</i> | Unknown  | 13 |
| TnrA    | <i>tuaA</i> | Positive | 66 |
| TnrA    | <i>tuaB</i> | Positive | 66 |
| TnrA    | <i>tuaC</i> | Positive | 66 |
| TnrA    | <i>tuaD</i> | Positive | 66 |
| TnrA    | <i>tuaF</i> | Positive | 66 |
| TnrA    | <i>yrbD</i> | Positive | 66 |

**Table S4.** Predicted intra-operonic motif sites. All genes predicted to have a motif site upstream are listed, together with their operons, and the predicted motif. If our prediction was listed by de Hoon *et al.* a ‘one’ is indicated.

| Gene         | Operon                                 | Predicted motif | Predicted by de Hoon <i>et al.</i> |
|--------------|----------------------------------------|-----------------|------------------------------------|
| <i>acoB</i>  | <i>acoABCL</i>                         | motif_14        | 0                                  |
| <i>appC</i>  | <i>appDFABC</i>                        | CodY            | 0                                  |
| <i>araP</i>  | <i>araABDLMNPQ-abfA</i>                | CcpA            | 1                                  |
| <i>bioI</i>  | <i>bioWAFDBI-ytbQ</i>                  | CodY            | 0                                  |
| <i>cgeB</i>  | <i>cgeAB</i>                           | motif_75        | 0                                  |
| <i>comEB</i> | <i>comEABC</i>                         | ComK            | 0                                  |
| <i>degU</i>  | <i>degSU</i>                           | motif_187       | 1                                  |
| <i>dppC</i>  | <i>dppABCDE</i>                        | CodY            | 0                                  |
| <i>flhO</i>  | <i>usd-spoIIID-mbl-flhOP</i>           | motif_106       | 1                                  |
| <i>fold</i>  | <i>nusB-fold</i>                       | PurR            | 0                                  |
| <i>glpK</i>  | <i>glpFK</i>                           | CcpA            | 0                                  |
| <i>glpK</i>  | <i>glpFK</i>                           | motif_106       | 0                                  |
| <i>hemC</i>  | <i>hemAXCDBL</i>                       | PerR            | 0                                  |
| <i>hemL</i>  | <i>hemAXCDBL</i>                       | ComK            | 0                                  |
| <i>hemL</i>  | <i>hemAXCDBL</i>                       | motif_187       | 0                                  |
| <i>iolD</i>  | <i>mmsA-iolBCDEF-idh-iolHI-fbaB</i>    | CcpA            | 1                                  |
| <i>mbl</i>   | <i>usd-spoIIID-mbl-flhOP</i>           | motif_14        | 1                                  |
| <i>mmgD</i>  | <i>mmgABCDE-yqiQ</i>                   | SigE            | 0                                  |
| <i>nupC</i>  | <i>deoR-dra-nupC-pdp</i>               | CcpA            | 0                                  |
| <i>nupC</i>  | <i>deoR-dra-nupC-pdp</i>               | motif_14        | 0                                  |
| <i>oppB</i>  | <i>oppABCDF</i>                        | SigE            | 0                                  |
| <i>punA</i>  | <i>drm-punA</i>                        | CcpA            | 0                                  |
| <i>purM</i>  | <i>purEKBCSQLFMNHD</i>                 | PurR            | 0                                  |
| <i>qcrC</i>  | <i>qcrABC</i>                          | AbrB            | 0                                  |
| <i>rbsC</i>  | <i>rbsRKDACB</i>                       | CcpA            | 0                                  |
| <i>rocB</i>  | <i>rocABC</i>                          | CcpA            | 0                                  |
| <i>rplT</i>  | <i>infC-rpmI-rplT-ysdA</i>             | CcpA            | 0                                  |
| <i>rpsF</i>  | <i>yyaF-rpsF-ssb-rpsR</i>              | motif_2         | 1                                  |
| <i>rpsR</i>  | <i>yyaF-rpsF-ssb-rpsR</i>              | motif_2         | 0                                  |
| <i>rsbT</i>  | <i>rsbRSTUVW-sigB-rsbX</i>             | ComK            | 0                                  |
| <i>sipV</i>  | <i>yhjE-sipV</i>                       | ComK            | 0                                  |
| <i>tagB</i>  | <i>tagAB</i>                           | PerR            | 0                                  |
| <i>trpF</i>  | <i>trpEDCFBA-hisC-tyrA-aroE</i>        | motif_187       | 0                                  |
| <i>yacF</i>  | <i>pabBAC-sul-folBK-yazB-yacF-lysS</i> | ComK            | 0                                  |
| <i>yacK</i>  | <i>ctsR-mcsAB-clpC-radA-yacK</i>       | motif_53        | 0                                  |
| <i>yceD</i>  | <i>yceCDEFGH</i>                       | AbrB            | 0                                  |

|             |                                       |           |   |
|-------------|---------------------------------------|-----------|---|
| <i>ydjI</i> | <i>pspA-ydjGHI</i>                    | SigW AbrB | 0 |
| <i>yfhE</i> | <i>yfhFED</i>                         | motif_14  | 1 |
| <i>yfiA</i> | <i>malA-yfiA-malP</i>                 | SigE      | 0 |
| <i>yfnD</i> | <i>yfnHGFED</i>                       | motif_187 | 0 |
| <i>yhaM</i> | <i>yhaONM</i>                         | ComK      | 1 |
| <i>ylxF</i> | <i>fla-che</i>                        | motif_106 | 0 |
| <i>ylxR</i> | <i>ylxS-nusA-ylxRQ-infB-ylxP-rbfA</i> | motif_2   | 0 |
| <i>yoxB</i> | <i>yoxCB-yoaA</i>                     | motif_53  | 0 |
| <i>yqcK</i> | <i>arsR-yqcK-arsBC</i>                | motif_53  | 1 |
| <i>yqfA</i> | <i>yqeZ-yqfA-yqfB</i>                 | AbrB      | 0 |
| <i>yqzE</i> | <i>comGABCDEFGG-yqzE</i>              | CodY      | 1 |
| <i>yrvI</i> | <i>relA-yrvI</i>                      | ComK      | 1 |
| <i>ytxH</i> | <i>ytxGHJ</i>                         | motif_260 | 0 |
| <i>yurG</i> | <i>yurHG</i>                          | motif_3   | 1 |
| <i>yvfM</i> | <i>yvfKLM-lacA-yvfO</i>               | motif_14  | 0 |
| <i>ywcH</i> | <i>nfrA-ywcH</i>                      | motif_53  | 1 |
| <i>yxiE</i> | <i>bglPH-yxiE</i>                     | ResD      | 0 |

**Table S5.** A list of all arrays and their assigned conditional categories. The column ‘Array’ refers to the experiment according to the source database (SMD, the first 3 arrays; GEO, the rest), while ‘Category’ refers to one of the 6 conditional categories, or to a control experiment.

| <b>Array</b> | <b>Category</b> |
|--------------|-----------------|
| C_26966      | peroxide        |
| C_26967      | peroxide        |
| C_26968      | peroxide        |
| GSM104507    | control         |
| GSM104511    | control         |
| GSM104514    | control         |
| GSM104517    | DNA             |
| GSM104518    | DNA             |
| GSM104519    | DNA             |
| GSM104520    | DNA             |
| GSM104521    | DNA             |
| GSM104522    | DNA             |
| GSM104523    | DNA             |
| GSM104524    | DNA             |
| GSM104525    | DNA             |
| GSM104526    | control         |
| GSM104527    | control         |
| GSM104528    | control         |
| GSM104727    | DNA             |
| GSM104728    | DNA             |
| GSM104729    | DNA             |
| GSM104730    | DNA             |
| GSM104731    | DNA             |
| GSM104732    | DNA             |
| GSM104733    | DNA             |

---

|           |                 |
|-----------|-----------------|
| GSM104734 | DNA             |
| GSM104735 | DNA             |
| GSM105249 | sporulation     |
| GSM105250 | sporulation     |
| GSM105251 | sporulation     |
| GSM105252 | DNA             |
| GSM105253 | DNA             |
| GSM105254 | DNA             |
| GSM105255 | DNA             |
| GSM105256 | DNA             |
| GSM105257 | DNA             |
| GSM105258 | DNA             |
| GSM105259 | DNA             |
| GSM105260 | DNA             |
| GSM105261 | control         |
| GSM105262 | control         |
| GSM105263 | control         |
| GSM105264 | DNA             |
| GSM105265 | DNA             |
| GSM105266 | DNA             |
| GSM105267 | DNA             |
| GSM105268 | DNA             |
| GSM105269 | DNA             |
| GSM105270 | DNA             |
| GSM105271 | quorum response |
| GSM105272 | DNA             |
| GSM105273 | DNA             |
| GSM105280 | quorum response |
| GSM105281 | quorum response |
| GSM105282 | quorum response |
| GSM105283 | quorum response |
| GSM105284 | quorum response |
| GSM105285 | quorum response |
| GSM105286 | quorum response |
| GSM105287 | quorum response |
| GSM105288 | quorum response |
| GSM105289 | quorum response |
| GSM105290 | quorum response |
| GSM105326 | control         |
| GSM105327 | control         |
| GSM105328 | control         |
| GSM105329 | quorum response |
| GSM105330 | DNA             |
| GSM105331 | DNA             |
| GSM105332 | DNA             |
| GSM105345 | DNA             |
| GSM105346 | quorum response |
| GSM105347 | DNA             |
| GSM105348 | DNA             |
| GSM105349 | quorum response |
| GSM105350 | DNA             |
| GSM105351 | DNA             |
| GSM105352 | quorum response |

---



---

|           |                 |
|-----------|-----------------|
| GSM105353 | DNA             |
| GSM105354 | quorum response |
| GSM105355 | quorum response |
| GSM105356 | quorum response |
| GSM105357 | quorum response |
| GSM105358 | quorum response |
| GSM105359 | control         |
| GSM105360 | control         |
| GSM105361 | control         |
| GSM105416 | DNA             |
| GSM105417 | DNA             |
| GSM105418 | DNA             |
| GSM105419 | control         |
| GSM105420 | control         |
| GSM105421 | control         |
| GSM105422 | DNA             |
| GSM105423 | DNA             |
| GSM105424 | DNA             |
| GSM105425 | DNA             |
| GSM105426 | DNA             |
| GSM105427 | DNA             |
| GSM27217  | sporulation     |
| GSM27218  | sporulation     |
| GSM27219  | sporulation     |
| GSM27278  | sporulation     |
| GSM27279  | sporulation     |
| GSM27280  | sporulation     |
| GSM27281  | sporulation     |
| GSM27282  | sporulation     |
| GSM27283  | sporulation     |
| GSM27285  | sporulation     |
| GSM27286  | sporulation     |
| GSM27288  | sporulation     |
| GSM27514  | sporulation     |
| GSM27515  | sporulation     |
| GSM27516  | sporulation     |
| GSM49830  | control         |
| GSM49975  | control         |
| GSM49998  | phosphate       |
| GSM50000  | phosphate       |
| GSM50002  | phosphate       |
| GSM50003  | phosphate       |
| GSM50008  | control         |
| GSM50378  | phosphate       |
| GSM50472  | phosphate       |
| GSM51432  | phosphate       |
| GSM51433  | phosphate       |
| GSM51434  | phosphate       |
| GSM51435  | control         |
| GSM51436  | phosphate       |
| GSM51437  | phosphate       |
| GSM51438  | phosphate       |
| GSM51439  | phosphate       |

---

---

|          |           |
|----------|-----------|
| GSM51440 | phosphate |
| GSM51441 | control   |
| GSM51442 | phosphate |
| GSM51443 | phosphate |
| GSM51444 | phosphate |
| GSM51445 | phosphate |
| GSM51446 | control   |
| GSM51447 | control   |
| GSM51448 | phosphate |
| GSM51449 | phosphate |
| GSM51450 | phosphate |
| GSM51451 | control   |
| GSM51452 | control   |
| GSM51453 | phosphate |
| GSM51454 | phosphate |
| GSM51455 | phosphate |
| GSM51456 | phosphate |
| GSM51457 | control   |
| GSM51458 | control   |
| GSM51459 | phosphate |
| GSM51460 | phosphate |
| GSM51461 | phosphate |
| GSM70016 | peroxide  |
| GSM70017 | peroxide  |
| GSM70018 | peroxide  |
| GSM70019 | peroxide  |
| GSM70020 | peroxide  |
| GSM70021 | peroxide  |
| GSM70022 | peroxide  |
| GSM70023 | peroxide  |
| GSM70024 | heat      |
| GSM70025 | heat      |
| GSM70026 | heat      |
| GSM70027 | heat      |
| GSM70028 | peroxide  |
| GSM70029 | heat      |
| GSM70030 | peroxide  |
| GSM70031 | heat      |
| GSM70032 | heat      |
| GSM70033 | peroxide  |
| GSM70034 | heat      |
| GSM70035 | peroxide  |
| GSM70036 | heat      |
| GSM70037 | heat      |
| GSM70038 | peroxide  |
| GSM70039 | peroxide  |
| GSM70040 | peroxide  |
| GSM70041 | peroxide  |
| GSM70042 | peroxide  |
| GSM70043 | peroxide  |
| GSM70044 | peroxide  |
| GSM70045 | peroxide  |
| GSM70046 | peroxide  |

---

---

|          |          |
|----------|----------|
| GSM70047 | peroxide |
| GSM70048 | peroxide |
| GSM70049 | peroxide |
| GSM70050 | peroxide |
| GSM70051 | peroxide |
| GSM70052 | heat     |
| GSM70053 | peroxide |
| GSM70054 | heat     |
| GSM70055 | peroxide |
| GSM70056 | heat     |
| GSM70057 | peroxide |
| GSM70058 | peroxide |
| GSM70059 | heat     |
| GSM70060 | peroxide |
| GSM70061 | peroxide |
| GSM70062 | peroxide |
| GSM70063 | peroxide |
| GSM70064 | peroxide |
| GSM70065 | peroxide |
| GSM70066 | peroxide |
| GSM70067 | peroxide |
| GSM70068 | peroxide |
| GSM70069 | peroxide |
| GSM70070 | peroxide |
| GSM70071 | peroxide |
| GSM70072 | peroxide |
| GSM70073 | peroxide |
| GSM70074 | peroxide |
| GSM70075 | peroxide |
| GSM70076 | peroxide |
| GSM70077 | peroxide |
| GSM70078 | peroxide |
| GSM70079 | peroxide |
| GSM70080 | peroxide |
| GSM70081 | peroxide |
| GSM70082 | heat     |
| GSM70083 | peroxide |
| GSM70084 | heat     |
| GSM70085 | peroxide |
| GSM70086 | peroxide |
| GSM70087 | peroxide |
| GSM70088 | peroxide |
| GSM70089 | peroxide |
| GSM70090 | peroxide |
| GSM70091 | peroxide |
| GSM70092 | peroxide |
| GSM70093 | peroxide |

---
